# Supplementary material for: Sitagliptin monotherapy has better effect on insulinogenic index than glimepiride monotherapy in Japanese patients with type 2 diabetes mellitus: a 52-week, multicenter, parallel-group randomized controlled trial
Source: PubMed Central journal article supplement (PMC4769515; doi:10.1186/s13098-016-0131-y), 2016-02-27

FigureS2

NGSP (%)

8.0

7.5

7.0

6.5

6.0

0

10

20

30

40

50

week

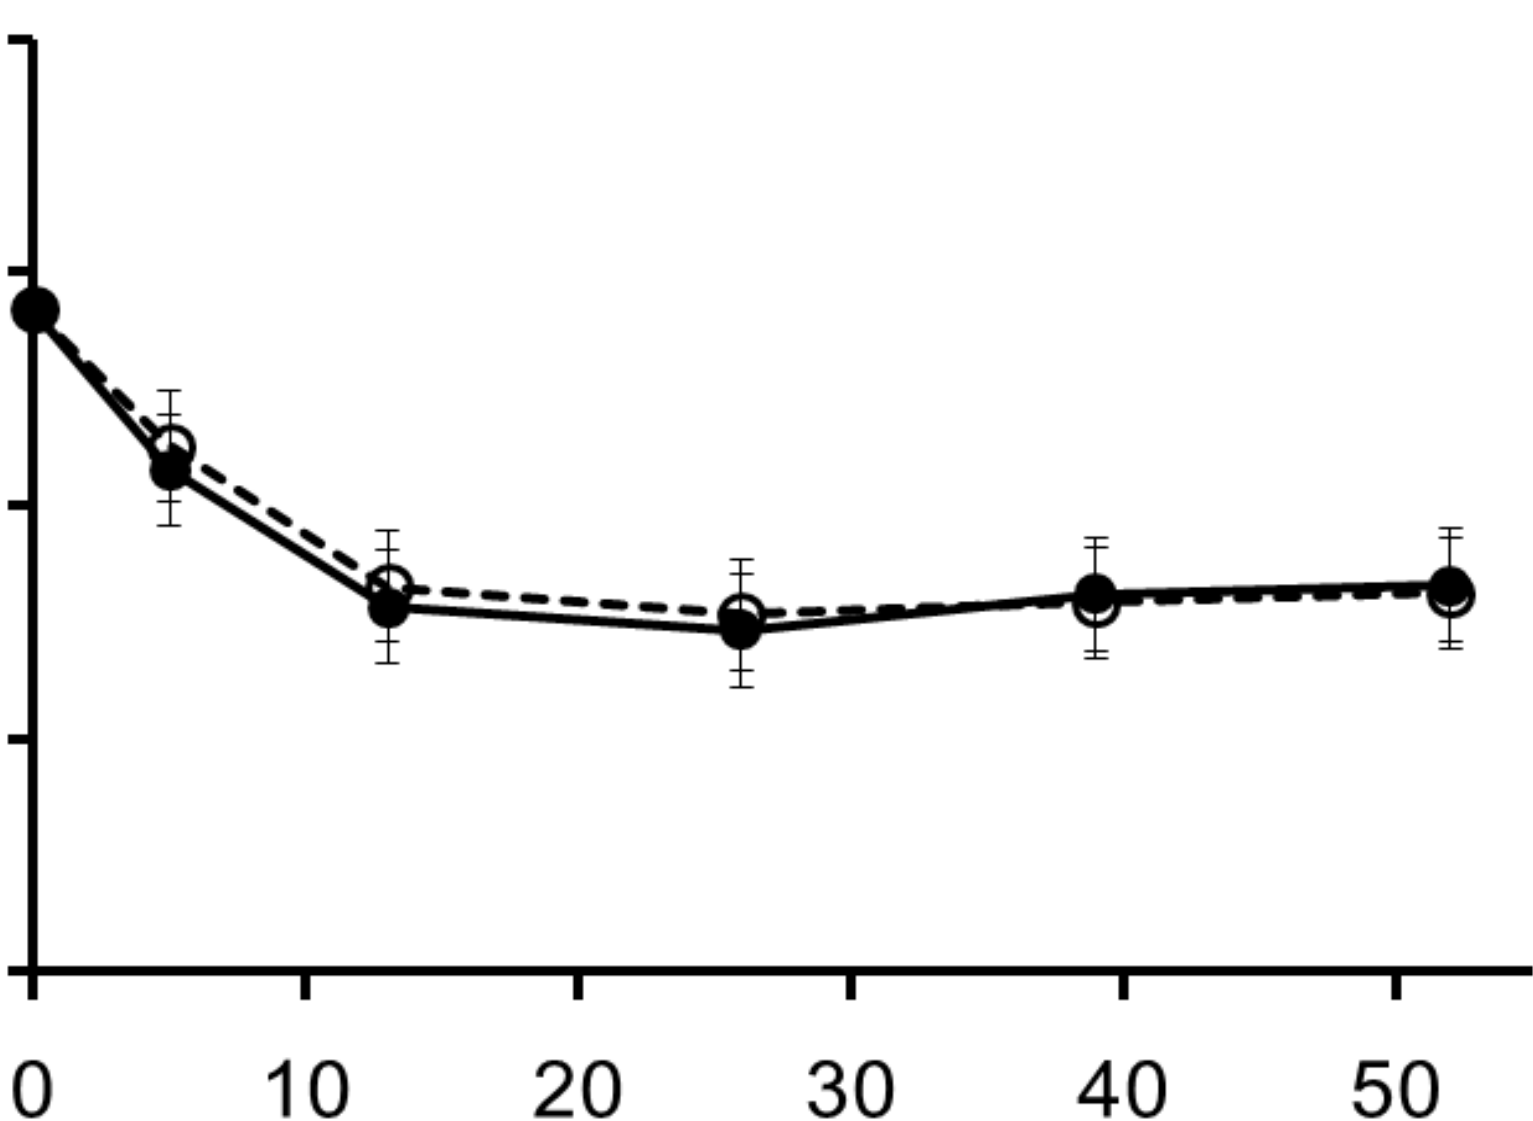

Supplement: 13098_2016_131_MOESM2_ESM.pdf [file 13098_2016_131_MOESM2_ESM.pdf]
