# Supplementary material for: Sitagliptin monotherapy has better effect on insulinogenic index than glimepiride monotherapy in Japanese patients with type 2 diabetes mellitus: a 52-week, multicenter, parallel-group randomized controlled trial
Source: Springer Nature journal article supplement (doi:10.1186/s13098-016-0131-y), 2016-02-26

FigureS1

## Glimepiride

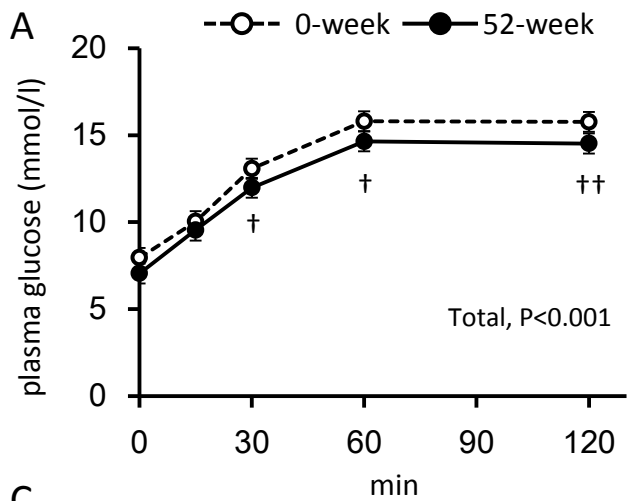

## Sitagliptin

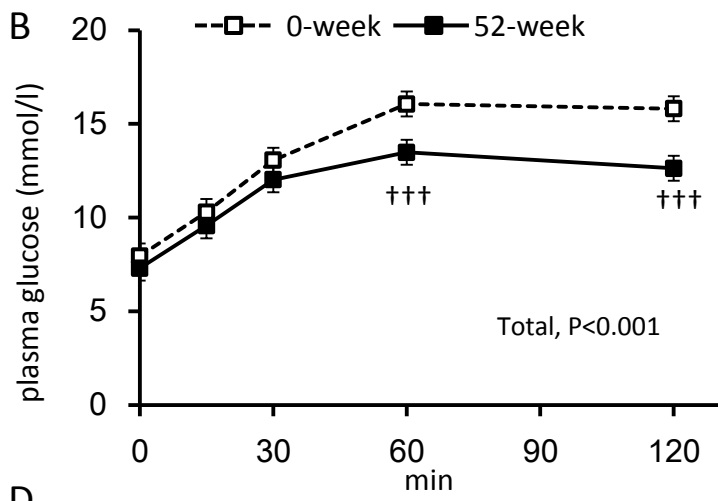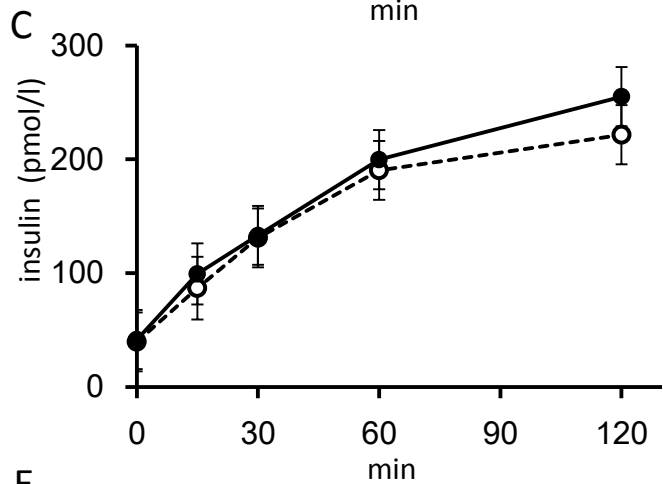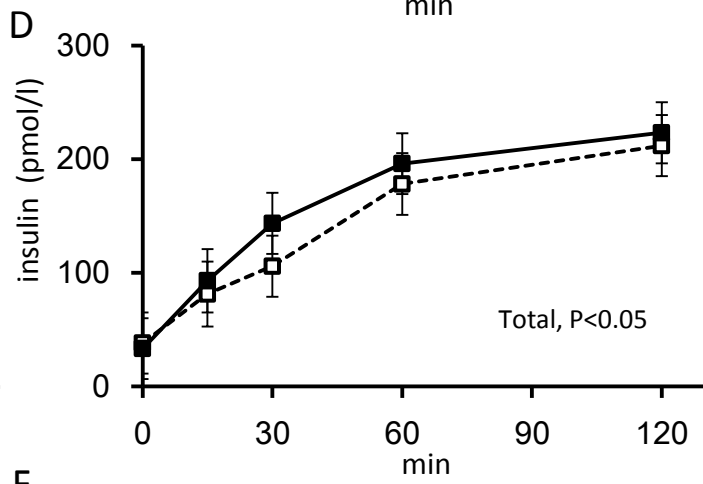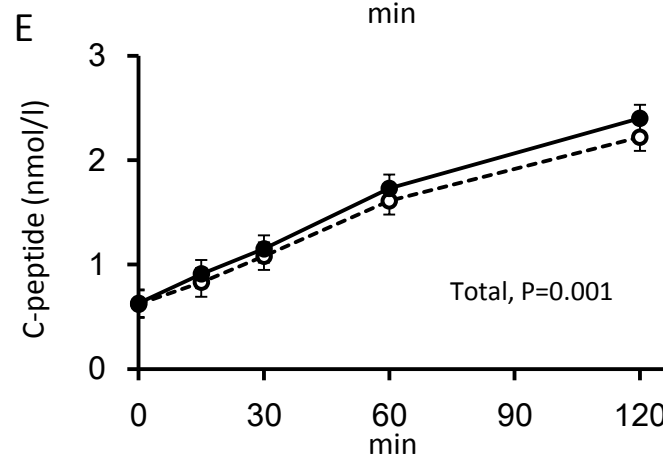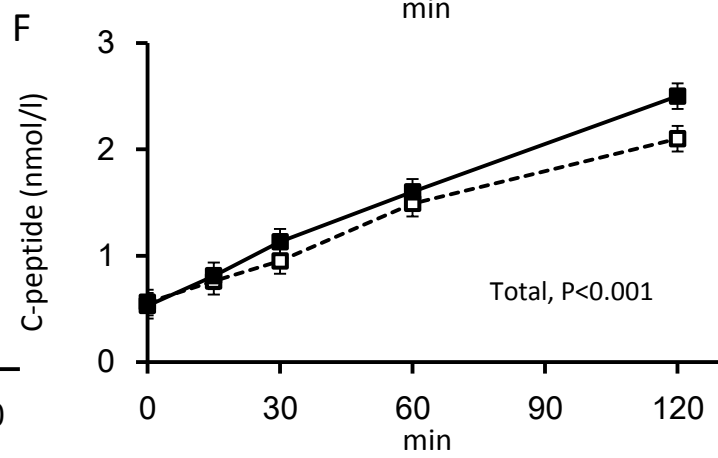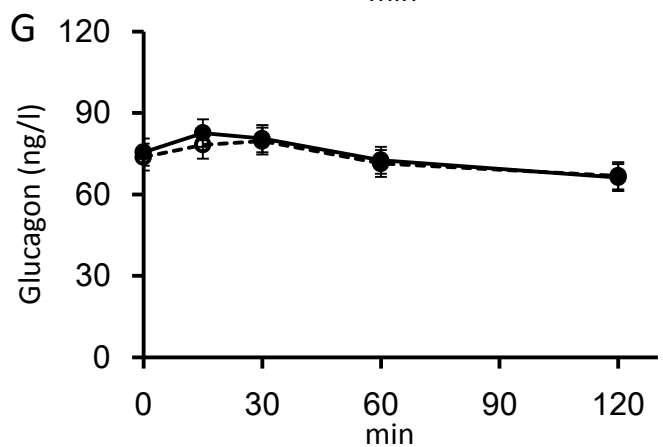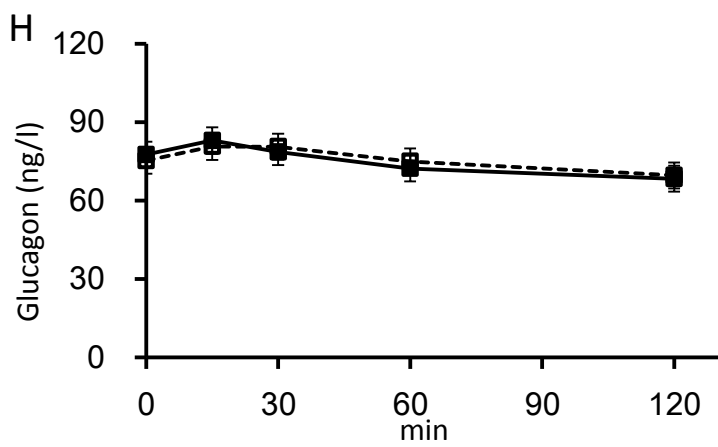

Supplement: MOESM1 [file 9784706]
